# Supplementary material
Source: PubMed Central journal article supplement (PMC3419909)
Supplement: bph0166-1654-SD1.pdf [file bph0166-1654-SD1.pdf]

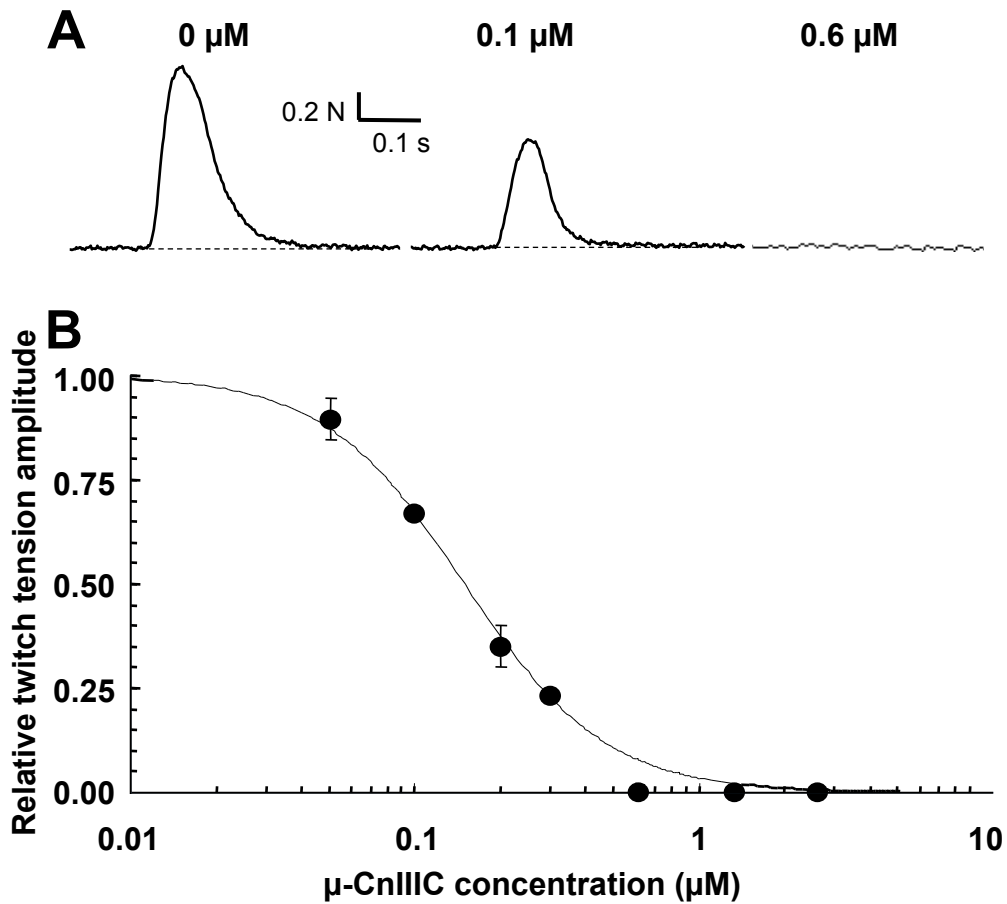

**Supplemental Figure 1.** Effect of  $\mu\text{-CnIIIc}$  on directly-elicited isometric twitch tension on mouse hemidiaphragms. (A) Representative twitch tension recordings obtained before and after treatment with 0.1 and 0.6  $\mu\text{M}$   $\mu\text{-CnIIIc}$ . (B) Concentration-response curve for  $\mu\text{-CnIIIc}$  generated in different muscles, and expressed relative to its control value. Points are mean values  $\pm$  S.E.M. obtained for each studied concentration of the conopeptide, with  $n = 3-6$ . When error bars are not apparent, this means that they are within the size of the symbols. The  $\mu\text{-CnIIIc}$  concentration that inhibited 50% twitch tension was 150 nM.
