# Supplementary material
Source: PubMed Central journal article supplement (PMC3419909)
Supplement: bph0166-1654-SD2.pdf [file bph0166-1654-SD2.pdf]

**A**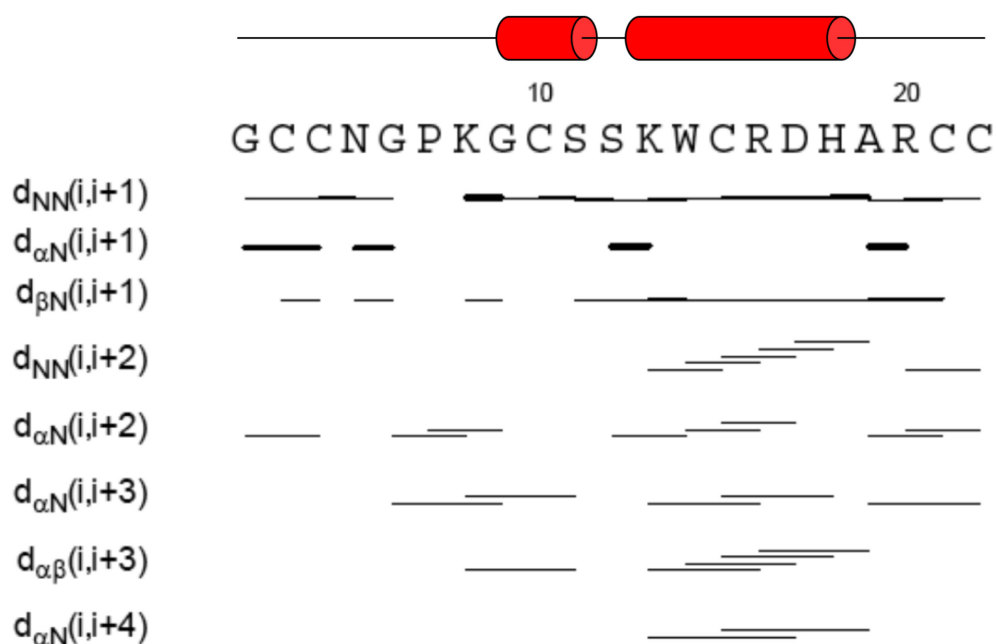**B**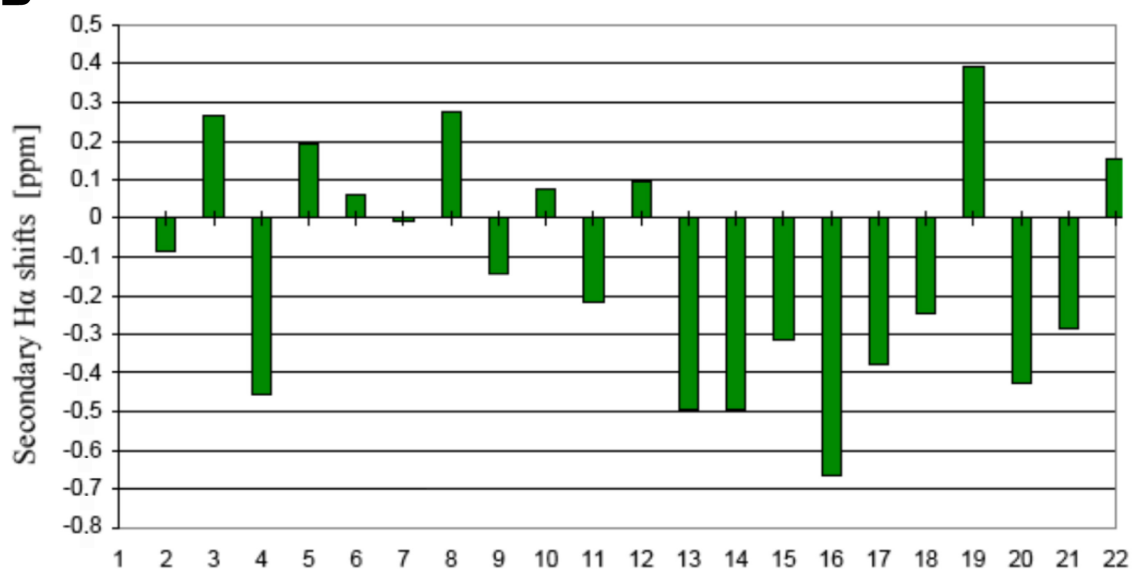

**Supplemental Figure 2.** Secondary structural indicators for  $\mu$ -CnIIIC. (A) Short- and medium-range NOE patterns observed in the NOESY spectra. Consensus  $\alpha$ -helices (red cylinder) and loops (straight line) shown above amino acid sequence. (B) Secondary H $\alpha$  shifts calculated per residue using BMRB random shift values.
